# Supplementary material for: The genesis of Hurricane Nate and its interaction with a nearby environment of very dry air
Source: Copernicus journal article supplement (doi:10.5194/acp-17-10349-2017), 2017-09-04
Supplement: Supplementary file 1 [file acp-17-10349-2017-supplement.zip]

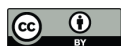

## *Supplement of*

# **The genesis of Hurricane Nate and its interaction with a nearby environment of very dry air**

**Blake Rutherford et al.**

*Correspondence to:* Blake Rutherford ([blake@nwra.com](mailto:blake@nwra.com))

- [acp-17-10349-2017-supplement-title-page.pdf](#)
- [manifolds.docx](#)
- [manifolds.mat](#)

The copyright of individual parts of the supplement might differ from the CC BY 3.0 License.
